# Supplementary material
Source: Elsevier journal article supplement (https://www.sciencedirect.com/science/article/pii/S0014256522000649)
Supplement: mmc1 [file S0014256522000649:mmc1.pdf]

**Figura 1.** Distribución de la estancia hospitalaria de los pacientes hospitalizados en unidades de corta estancia (UCE) y los pacientes que fueron hospitalizados en otros servicios hospitalarios. Los cálculos se presentan por duplicado, con (arriba) y sin (abajo) incluir los pacientes fallecidos durante el ingreso.

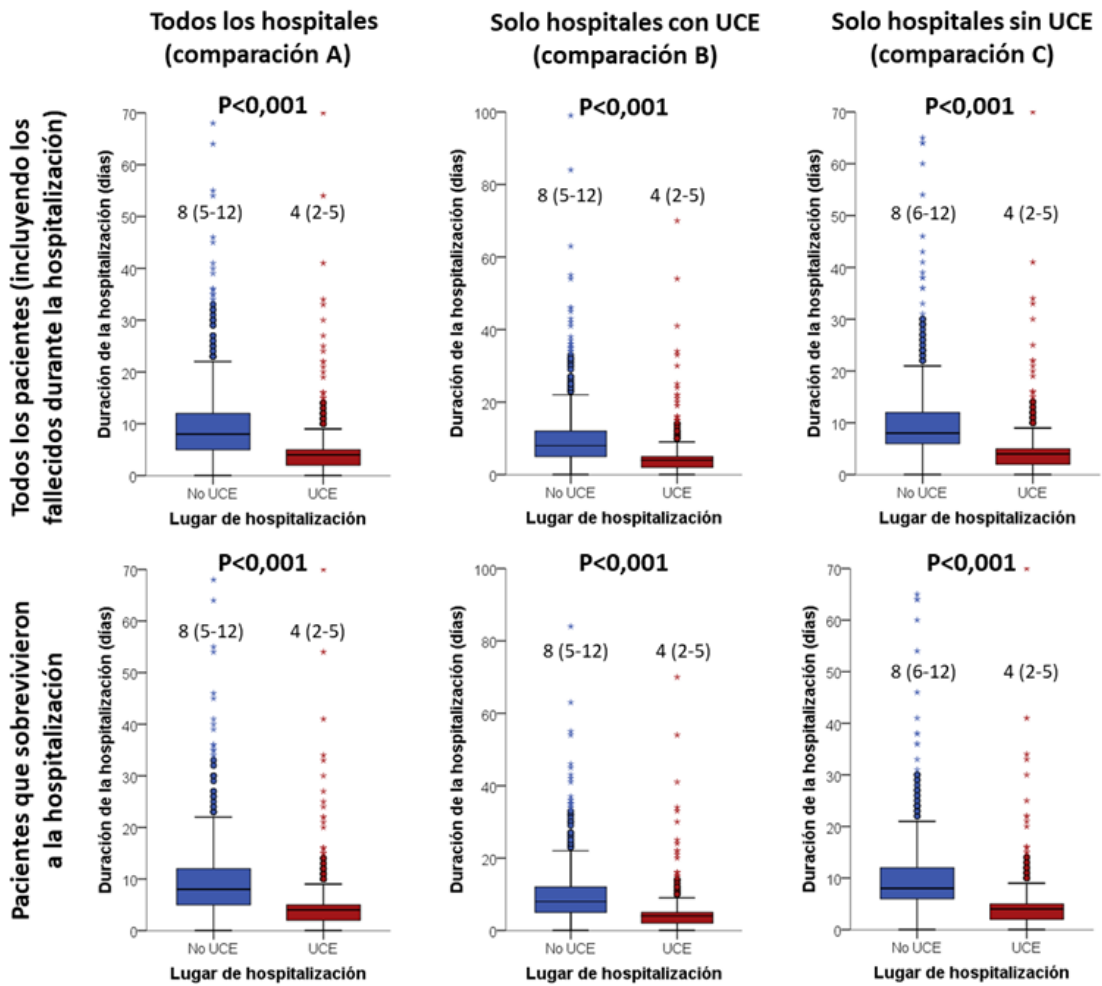

UCE: unidad de corta estancia.
